# Supplementary material for: Effective ways to enhance the photocatalytic activity of ZnO nanopowders: high crystalline degree, more oxygen vacancies, and preferential growth
Source: Royal Society of Chemistry journal article supplement (doi:10.1039/c9nj04767k), 2019-01-01

## Supplementary Information

### Effective ways to enhance photocatalytic activity of ZnO nanopowders: high crystalline degree, more oxygen vacancies, and preferential growth

Yingying Lv, Jiayu Lin, Siyan Peng, Laijun Zhang, Leshu Yu\*

*School of Chemistry and Environmental Science, Key Laboratory of Polymer Preparation and Processing, Shangrao Normal University, Jiangxi, China, 334001*

**Figure S1 SEM images of Zn powder**

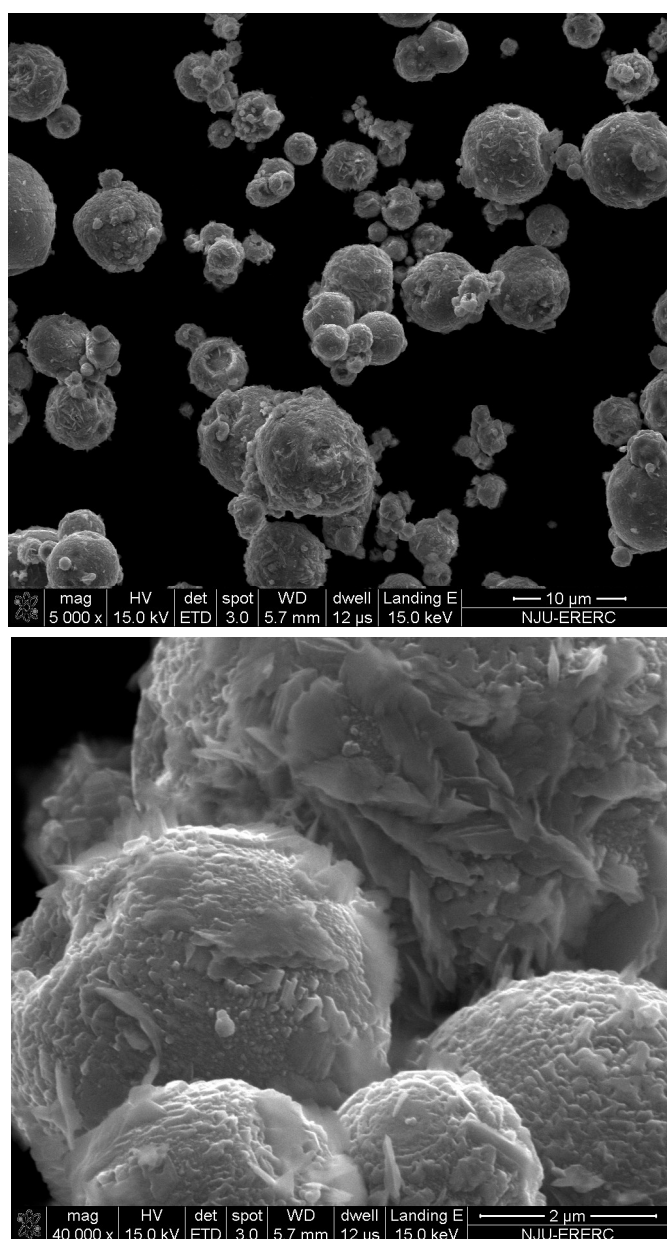

**Figure S2** FT-IR spectra of various ZnO samples in the range of 450~3500  $\text{cm}^{-1}$

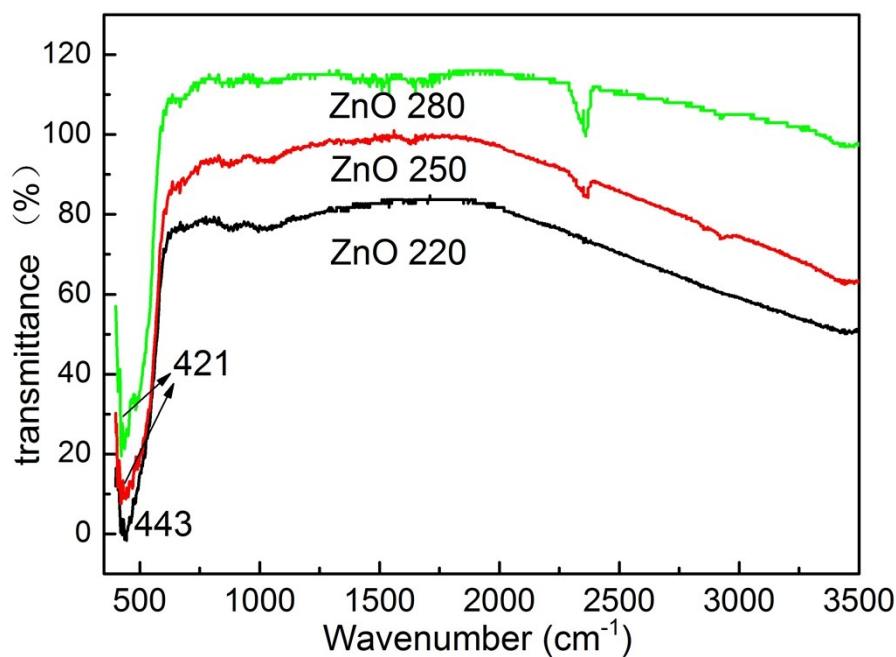

**Figure S3** Time-dependent absorption spectra of a rhodamine B aqueous solution in the presence of various ZnO samples with a weight of 50 mg under 365 nm UV irradiation.

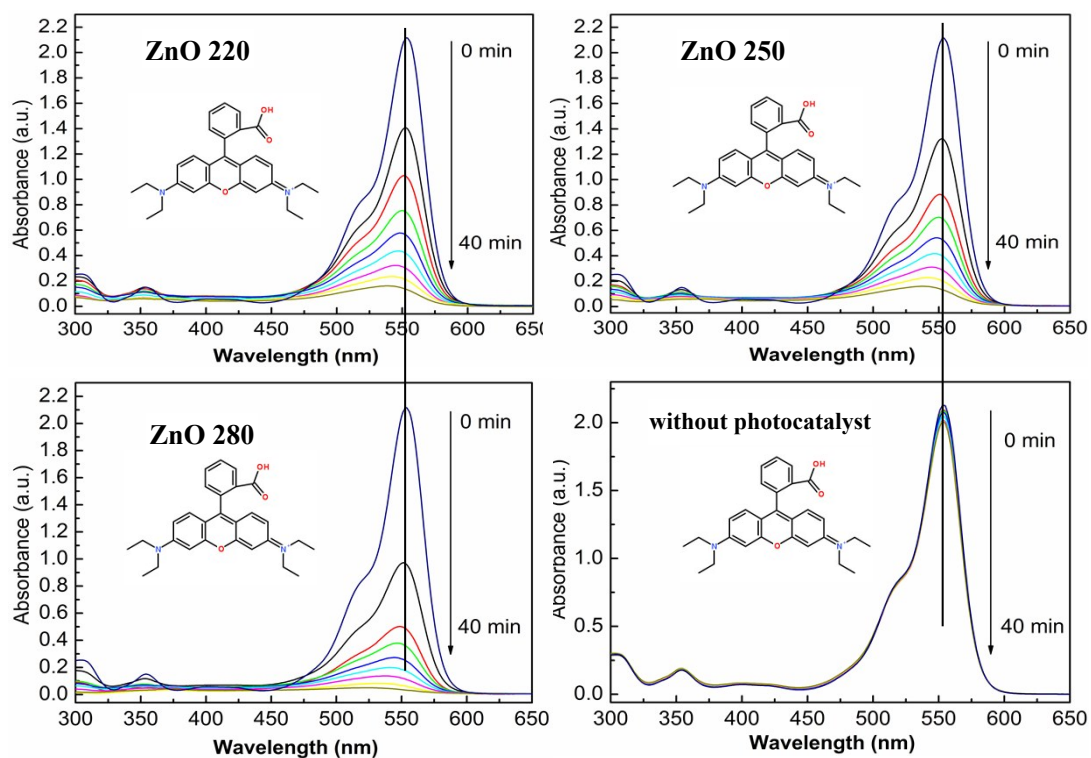

**Figure S4** Degradation ratio of Rh-B over different dosage of ZnO 280 under UV irradiation for different times.

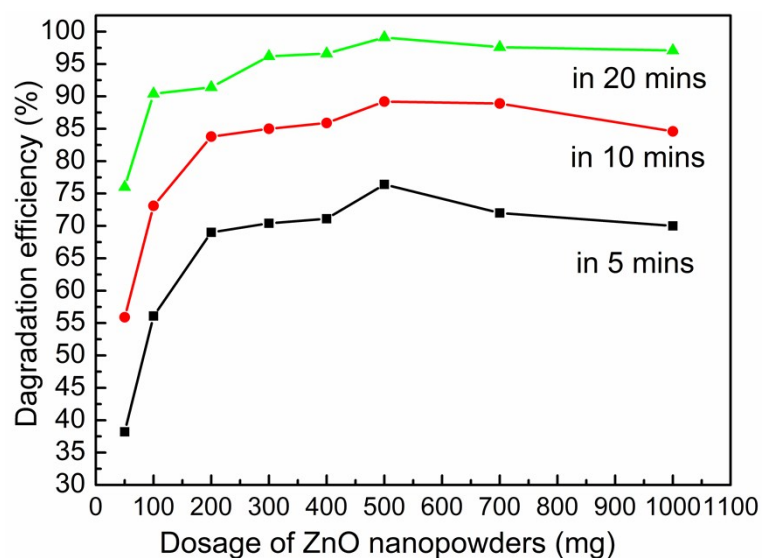

**Figure S5** XRD patterns of the ZnO samples before and after photocorrosion (under the UV irradiation for 20 h).

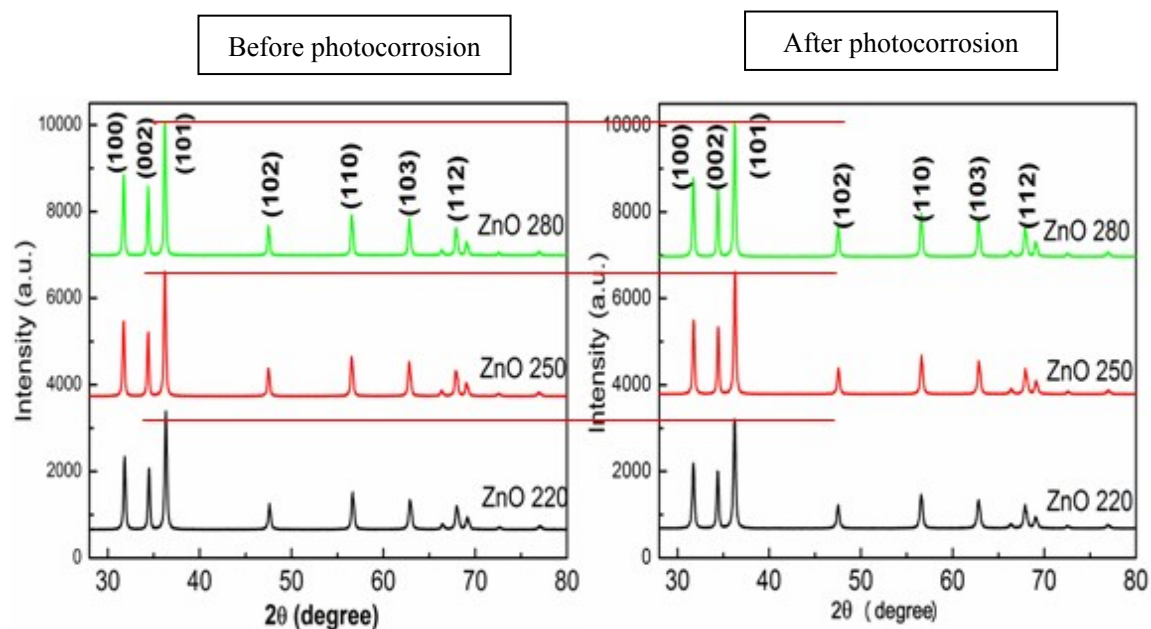

Supplement: c9nj04767k1.pdf [file c9nj04767k1.pdf]
